# Supplementary material for: Cross-Tailoring Integrative Alcohol and Risky Sexual Behavior Feedback for College Students: Protocol for a Hybrid Type 1 Effectiveness-Implementation Trial
Source: PubMed Central journal article supplement (PMC10131715; doi:10.2196/43986), 2023-03-20
Supplement: resprot_v12i1e43986_app1.pdf [file resprot_v12i1e43986_app1.pdf]

**SUMMARY STATEMENT**

**PROGRAM CONTACT:**  
Dr. Robert Freeman  
301443-8820  
rfreeman@mail.nih.gov

( Privileged Communication )

*Release Date:* 06/15/2020  
*Revised Date:*

Principal Investigator  
RAY, ANNE ELIZABETH

*Application Number:* 1 R01 AA028246-01A1  
*Formerly:* 1R01AA028246-01A1

Applicant Organization: UNIVERSITY OF KENTUCKY

*Review Group:* IPTA  
Interventions to Prevent and Treat Addictions Study Section

*Meeting Date:* 06/04/2020  
*Council:* OCT 2020  
*Requested Start:* 09/01/2020  
*RFA/PA:* PA18-390  
*PCC:* AP F

*Project Title:* Cross-Tailoring Integrative Alcohol and Risky Sex Feedback for College Students:  
A Hybrid Type 1 Effectiveness-Implementation Trial

*SRG Action:* Impact Score:20 Percentile:3

*Next Steps:* Visit [https://grants.nih.gov/grants/next\\_steps.htm](https://grants.nih.gov/grants/next_steps.htm)

*Human Subjects:* 48-At time of award, restrictions will apply

*Animal Subjects:* 10-No live vertebrate animals involved for competing appl.

*Gender:* 1A-Both genders, scientifically acceptable

*Minority:* 1A-Minorities and non-minorities, scientifically acceptable

*Age:* 7A-Only Adults, scientifically acceptable

| Project Year | Direct Costs Requested | Estimated Total Cost |
|--------------|------------------------|----------------------|
| 1            | 408,673                | 629,268              |
| 2            | 498,996                | 768,345              |
| 3            | 497,202                | 765,583              |
| 4            | 495,597                | 763,112              |
| 5            | 449,476                | 692,095              |
| <b>TOTAL</b> | <b>2,349,944</b>       | <b>3,618,403</b>     |

**ADMINISTRATIVE BUDGET NOTE:** The budget shown is the requested budget and has not been adjusted to reflect any recommendations made by reviewers. If an award is planned, the costs will be calculated by Institute grants management staff based on the recommendations outlined below in the COMMITTEE BUDGET RECOMMENDATIONS section.

EARLY STAGE INVESTIGATOR  
NEW INVESTIGATOR

RAY, A

**1R01AA028246-01A1 Ray, Anne****EARLY STAGE INVESTIGATOR  
NEW INVESTIGATOR  
PROTECTION OF HUMAN SUBJECTS UNACCEPTABLE**

**RESUME AND SUMMARY OF DISCUSSION:** This application proposes to develop and test a cross-tailored dynamic feedback intervention designed to enhance the effects of an integrated personalized feedback intervention for alcohol misuse and risky sexual behavior in college students. During the discussion, reviewers noted that the highly innovative use of a dynamic feedback system to address the significant problem of alcohol-linked sexual risk behavior has the potential to increase the short-term effects of personalized feedback interventions and advance intervention delivery in multiple fields. Significance is somewhat reduced, however, by the exclusion of naïve drinkers who escalate their drinking during the at-risk period. The highly responsive resubmission retains the rigorous multi-site, hybrid type 1 effectiveness-implementation design and methods, and has been improved by strengthening the rigor of the prior research in college students, better justifying the implementation aims, and including stakeholders other than students. The primary remaining concern with the approach is the lack of adequate information about participant flow to determine recruitment feasibility, particularly given the move to a new site. Overall, the panel concluded that the strengths of this innovative application outweigh the weaknesses, and the proposed project has the potential for high impact.

**DESCRIPTION (provided by applicant):** Alcohol misuse and related risky sexual behavior (RSB) are significant public health concerns among college students. Two-thirds of students are current drinkers, at least 1 in 3 report past month binge drinking (5+ drinks in a row), and 1 in 10 report high intensity drinking (10+ drinks in a row). Greater student alcohol consumption and heavy drinking on a given day is linked to increased sexual activity and RSB (e.g., unprotected sex, unplanned hook-ups). This puts students at risk for negative health outcomes (e.g., STIs) and is a pathway to sexual victimization and escalated drinking. The first few weeks of college, or the 'red zone,' present a critical window of opportunity to intervene for escalated alcohol use and associated risks, which can result in a potentially high public health and clinical impact. However, individual-level prevention strategies for college students tend to focus on students' alcohol use patterns and consequences more broadly, with little to no integration of content on the relationship between alcohol use and RSB, an important gap in the literature and a priority area for NIAAA. Our team previously established the short-term efficacy of a personalized feedback intervention (PFI), a gold standard intervention approach, with integrated content on alcohol and RSB. We propose to extend our integrated PFI to include a cross-tailored dynamic feedback (CDF) component, which leverages technology to incorporate daily assessments of student behavior and provide users with dynamic weekly feedback over 12 weeks to amplify the effectiveness of the integrated PFI and to be easily implemented on college campuses. The project utilizes a multisite, hybrid type 1 effectiveness-implementation study design to (1) evaluate the impact of CDF for at-risk first-year college students and (2) identify implementation factors critical to its success to facilitate future scale-up in campus settings. The first aim is to conduct a multi-level stakeholder-engaged adaptation of the integrated alcohol and risky sex PFI through the development and inclusion of CDF. The second aim is to conduct a randomized controlled trial (RCT) of the enhanced intervention (PFI+CDF) in a sample of 600 first-year college students who report recent binge drinking and are sexually active. Our primary hypothesis is that participants who receive the PFI+CDF intervention will report less alcohol use, fewer risky sexual behaviors, and fewer consequences relative to those who receive a PFI supplemented with generic health information at follow-up (1, 2, 3, 6, and 13 months). Our third aim seeks to identify factors critical to PFI+CDF

RAY, A

implementation in campus settings through conducting focus groups with a subset of students from the RCT and with local and national systems-level stakeholders. The intervention has strong potential for widespread dissemination and targets a group at high risk for alcohol misuse and RSB.

**PUBLIC HEALTH RELEVANCE:** Alcohol misuse and related risky sexual behavior are significant public health concerns among college students. This project involves (1) adapting and evaluating a technology-delivered behavioral intervention that is designed to reduce alcohol misuse and related risky sexual behavior among first-year college students while also (2) examining factors important to intervention implementation in college settings. If effective, the intervention may be widely disseminated and has the potential to make a positive impact on college student health.

## CRITIQUE 1

Significance: 1

Investigator(s): 2

Innovation: 2

Approach: 1

Environment: 2

**Overall Impact:** This is a R01 resubmission in response to FOA PA18-390. The application proposed to use a multisite, hybrid type 1 effectiveness-implementation study design to test an integrated (risky alcohol and risky sex) personalized feedback intervention with a cross-tailored dynamic feedback for risky college students at two sites. The first aim is to conduct focus groups with both students and student affairs stakeholders to adapt and refine the intervention. The second aim is a multi-site randomized controlled trial comparing four conditions that allow for the elucidation of self-monitoring and assessment effects. Outcomes include alcohol use, risky sexual behaviors, and fewer consequences at 1, 2, 3, 6, and 13-month follow-ups. The third aim involves focus groups with students as well as local and national student affairs stakeholders to examine implementation issues. This is a very well written application that is highly responsive to previous reviews in maintaining strengths and adapting. The potential public health impact of the project is high and the application provides a strong rationale for the current study based on a large body of rigorous research conducted by the team itself and the field in general. The investigative team is well selected to meet all of the aims of the grant and will provide extensive support to the early career PI. The approach to each aim is highly rigorous, with clear methodological and analytic plans.

### 1. Significance:

#### Strengths

- The application demonstrates the prevalence of unhealthy alcohol use among college students as well as the link between alcohol use and risky sexual behaviors, including event-level data.
- The application describes a body of rigorous research that supports the promise of BMIs, PFIs, integrated PFIs, and integrated PFIs that include dynamic feedback in college samples.
- The application describes the heterogeneity of PFI outcomes and provides a comprehensive review of others' and their own work that supports the promise of elements inherent in their intervention.
- The team developed and evaluated an integrated PFI with promising results.

RAY, A

- The application provides data supporting the acceptability of the intervention to college students based on focus groups and the feasibility of students accessing the feedback without incentives.
- It is compelling the application highlights how colleges face choices about adaptation of PFIs and we know little about how implementation decisions are made in this area.

#### **Weaknesses**

- None noted.

### **2. Investigator(s):**

#### **Strengths**

- The PI has described her involvement in several clinical trials.
- The roles and responsibilities of Co-Is and consultants are clearly described
- Klein Buendel will oversee the development of the web-based program and has extensive track record in this department
- Faculty at the University of North Texas Health Science Center will assist in the development of the intervention and real time analysis of data
- There have been some shifts in Co-Is based on the PIs new appointment at UK, however these seem well justified.

#### **Weaknesses**

- The PI's experience is limited to study management vs. leadership at the PI level.

### **3. Innovation:**

#### **Strengths**

- To date, no trials have evaluated an integrated PFI with cross-tailored dynamic feedback.
- The use of a hybrid type 1 effectiveness-implementation study design is innovative.

#### **Weaknesses**

- None noted.

### **4. Approach:**

#### **Strengths**

- The application provides a strong rationale for an HT1 design based on preliminary research supporting the promise of the intervention.
- Involvement of both students and other stakeholders such as campus administrators increases the relevance of Aims 1 and 3.
- It is compelling the application highlighted how colleges face choices about adaptation of PFIs and we know little about how implementation decisions are made in this area
- The application of the CFIR model to the focus groups in Aim 1 is clear.
- The approach is comprehensively described, rigorous, and appropriate to meet the aims of the grant.

RAY, A

- The analytic plan for each Aim is clear and rigorous.

**Weaknesses**

- None noted.

**5. Environment:****Strengths**

- The Department of Health, Behavior and Society within the University of Kentucky College of Public Health (CPH), University of North Texas Health Science Center (UNTHSC), and Klein Buendel (KB) have environments that are ideal to achieve the aims of the proposal.

**Weaknesses**

- None noted.

**Study Timeline:****Strengths**

- The timeline is detailed and appears feasible.

**Weaknesses**

- None noted.

**Protections for Human Subjects:**

Acceptable Risks and/or Adequate Protections

Data and Safety Monitoring Plan (Applicable for Clinical Trials Only):

Acceptable

**Inclusion Plans:**

- Sex/Gender: Distribution justified scientifically
- Race/Ethnicity: Distribution justified scientifically
- For NIH-Defined Phase III trials, Plans for valid design and analysis:
- Inclusion/Exclusion Based on Age: Distribution justified scientifically
- Adult participants 18-20 with gender and ethnicity/race characteristics representative of the campus populations. There is no justification for the exclusion of 17yo college students.

**Vertebrate Animals:**

Not Applicable (No Vertebrate Animals)

**Biohazards:**

Not Applicable (No Biohazards)

**Resubmission:**

RAY, A

- The application is highly responsive to prior review. The significance section has been updated to include data specific to college populations and event-level data and providing more rationale for implementation aims. Including stakeholders other than students in Aims 1 and 3 increases relevance.

### **Resource Sharing Plans:**

Not Applicable (No Relevant Resources)

### **Budget and Period of Support:**

Recommend as Requested

## **CRITIQUE 2**

Significance: 3

Investigator(s): 1

Innovation: 1

Approach: 2

Environment: 1

**Overall Impact:** Alcohol use and risky sexual behavior are significant public health problems among college students that are both interrelated and associated with other negative health outcomes. The importance of effective and early intervention is thus paramount. The proposed work would adapt an integrated personalized feedback intervention (PFI) for alcohol use and risky sexual behavior to include a cross-tailored dynamic feedback (CDF) component, which is highly innovative and has strong potential to heighten impact via this precision medicine approach. There is strong evidence that PFI's reduce college student drinking, but effects are limited in duration and rarely target alcohol-related negative outcomes, such as risky sexual behavior (RSB). The proposed study would add to the scientific literature via support for the use of just-in-time, personalized approaches for the proposed outcomes as well as a broader range of alcohol-related risk behavior. The team is qualified to conduct the proposed work and the environment is strong. The rigor of the research design is strong and includes qualitative methods to inform the adaptation, dissemination, and implementation process. The overall significance of the project is somewhat dampened by the exclusion of naïve drinkers who escalate their drinking during the at-risk "red zone" period. Minor weakness to the approach are not score driving. In conclusion, the application's strengths significantly outweigh these weaknesses and result in very strong proposal with high potential impact.

### **1. Significance:**

#### **Strengths**

- Personalized feedback interventions (PFIs) reduce college-student drinking, but the effects are limited in duration and rarely target alcohol-related negative outcomes, such as risky sexual behavior (RSB). The proposed integration of cross-tailored dynamic feedback to the research team's evidence-based, tech-delivered PFI for alcohol use and RSB has strong potential to address both gaps in the literature. [major strength]
- The proposed work is of key importance to the field in its innovative advancement of a personalized, dynamic approach to delivering intervention content. If successful, this work would

RAY, A

support the use of just-in-time, personalized approaches to reduce a broad range of alcohol-related risk behavior. [moderate strength]

- Delivering the intervention during the high-risk “red zone” period has high potential impact in the short-term but may also alter long-term trajectories of alcohol-related risk behavior. [minor strength]

### **Weaknesses**

- The sample is limited to students who report at least one binge drinking episode in the 30 days prior to the first week of college. This may exclude a key subgroup of students who (as noted in the proposal) are at particular risk during the “red zone” period: those who are non- or light drinkers when they come to college (and have little experience judging their tolerance and/or navigating drinking situations) but then engage in occasional heavy or binge drinking during the red zone period. Thus, even if the aims are achieved, it is unclear that results would generalize to these students. [moderate weakness]
- The extent to which daily assessments are designed or able to capture temporal sequencing between alcohol use and RSB is unclear. Assessing this sequencing will provide data on alcohol use as an antecedent and consequence of RSB – which the proposed strategy does not seem to accomplish. It will also allow for tests of whether reduced alcohol use leads temporally to a lower likelihood of other primary outcomes, including outcomes not assessed with respect to alcohol use (e.g., sex without a condom). Such data seems important to work that presumes alcohol use is contributing to RSB. [minor weakness]

## **2. Investigator(s):**

### **Strengths**

- The PI has assembled a strong team that possesses all the expertise necessary to achieve the proposed aims. Numerous team members have a history of collaboration, which will be critical to the execution of a multi-site project with numerous moving parts. [major strength]
- The PI has a wealth of expertise for an early stage investigator that is relevant to the key aspects of the project (e.g., the study population, implementing and evaluating interventions at the university-level, adapting interventions for technology delivery) as well as expertise leading large research projects while at REAL Prevention, LLC. [major strength]

### **Weaknesses**

- None noted.

## **3. Innovation:**

### **Strengths**

- The integration of personalized normative feedback with a cross-tailored dynamic feedback intervention represents an innovative shift in the field. [moderate strength]
- The use of machine learning technology to develop and deliver personalized feedback over a 3-month period is an innovative application in this field. This innovation allows for the novel augmentation of a widely used, but “static”, personalized normative feedback intervention with a precision medicine approach that heightens potential impact. [major strength]

### **Weaknesses**

- None noted.

RAY, A

#### **4. Approach:**

##### **Strengths**

- The experimental design is well conceived and includes appropriate comparison groups as well as checks to account for intervention exposure and assessment reactivity. Overall, the study design will allow for a clearer understanding of the impact of the PFI+CDF adaptation. [major strength]
- Use of qualitative methods with stakeholders to inform adaptation, dissemination, and implementation process increases the potential impact. [moderate strength]
- Focus groups will include students and student affairs professionals, the latter of whom will reflect professionals at the RCT sites and at the national level. This will maximize the likelihood that the intervention can be adapted with broader dissemination as an end goal. [moderate strength]

##### **Weaknesses**

- Anticipated size of incoming freshman classes at each site are not mentioned. Thus, the likelihood of obtaining 300 eligible students from each site cannot be fully evaluated. Relatedly, there are not letters of support from each institution which support the research team's plan to obtain student contact information from the registrar's office. [minor weakness] This weakness is somewhat offset by Co-I Lewis and Bush's experience with this recruitment approach at their respective institutions (although Co-I Lewis only recently moved to UNT so it is unclear if the necessary relationships have been built).
- Sexual and gender minority students are at greater risk for heavy episodic drinking and related health consequences, including RSB, that is driven in part by sexual and gender minority stigma. While not a central focus of this proposal, not assessing sexual and gender minority identities prevents any consideration of how (1) the intervention may be experienced by these students (Aim 1, Aim 3) and (2) effective the intervention is for these students. [minor weakness]

#### **5. Environment:**

##### **Strengths**

- The research environments at the University of Kentucky, University of North Texas Health Science Center, and Klein Buendel all provide sufficient resources to support the proposed study procedures.

##### **Weaknesses**

- None noted.

#### **Study Timeline:**

##### **Strengths**

- Timeline is detailed and reasonable.

##### **Weaknesses**

- None noted.

#### **Protections for Human Subjects:**



RAY, A

#### Unacceptable Risks and/or Inadequate Protections

- All consent forms will include referral information to campus resources and national hotlines related to sexual violence victimization. For those who request referrals, the team will provide them. However, the daily monitoring methodology will result in the team knowing about most sexual victimization experiences within 24 hours of its occurrence, and the team has the capacity to screen for this on a daily basis (in the same manner that potentially lethal alcohol use is identified). However, no procedures are in place which address Title IX mandated reporting or follow-up contact with the participant regarding the victimization experience.

#### Data and Safety Monitoring Plan (Applicable for Clinical Trials Only):

##### Acceptable

- DSMP is appropriate including the use of a DSM board.

#### Inclusion Plans:

- Sex/Gender: Distribution justified scientifically
- Race/Ethnicity: Distribution justified scientifically
- For NIH-Defined Phase III trials, Plans for valid design and analysis: Scientifically acceptable
- Inclusion/Exclusion Based on Age: Distribution justified scientifically
- Distribution of sex/gender and race/ethnicity are expected to reflect the college population at the two universities. Children are excluded as the because it is unlikely that there is large number of children at these universities.

#### Vertebrate Animals:

Not Applicable (No Vertebrate Animals)

#### Biohazards:

Not Applicable (No Biohazards)

#### Resubmission:

- The application is highly responsive to prior review comments. The rigor of prior research has been strengthened in several areas, the justification for the implementation framework is strong, the PI's expertise and experience managing large, multisite NIH trials has been clarified, and relevant pilot data has been provided regarding the acceptability and feasibility of PFI+CDF.

#### Resource Sharing Plans:

Acceptable

#### Budget and Period of Support:

Recommend as Requested

### CRITIQUE 3

RAY, A

Significance: 2  
Investigator(s): 2  
Innovation: 1  
Approach: 4  
Environment: 2

**Overall Impact:** The proposed R01 is a resubmission of a two-site effectiveness-implementation study evaluating the impact of cross-tailored dynamic feedback (CDF) for heavy-drinking first-year college students who are sexually active. It involves adapting an efficacious, integrated PFI for alcohol and sexual risk behavior based on focus groups with stakeholders; examining the effectiveness of the PFI+CDF among at-risk college students; and evaluating factors that influence implementation, again via focus groups. The potential impact of this research is high, and the use of dynamic feedback is innovative. The research team is somewhat large; however, each investigator is strong in their respective area. The research design is innovative for the alcohol and addiction literature and is expected to improve the scalability of the intervention. Investigators were responsive to previous research concerns. The primary remaining weaknesses of the proposal is inadequate description of participant flow to determine feasibility of recruitment.

## 1. Significance:

### Strengths

- Greater alcohol consumption is linked to risky sexual behavior at the within-person level.
- Risky sexual behavior has been associated with STI, unplanned pregnancy, and sexual victimization.
- The first few weeks of college are associated with escalations in both drinking and sexual assault.
- Integrated alcohol and SRB interventions are needed because alcohol intoxication and related contextual factors play a central role in sexual decision-making.
- The hybrid effectiveness-implementation design will speed translation of scientific findings to real-world context.

### Weaknesses

- Minor: The societal and long-term impacts of risky sexual behavior among college students are not described.

## 2. Investigator(s):

### Strengths

- PI Ray (Kentucky) is an early career investigator who has extensive experience coordinating brief alcohol intervention RCTs and working with community stakeholders to implement technology-based interventions.
- The expertise of the assembled research team is outstanding.
- A plan for coordination among organizations is outlined.

### Weaknesses

- As noted in prior reviews, the overall team is rather large and multiple members of the team have overlapping expertise.

RAY, A

### **3. Innovation:**

#### **Strengths**

- Hybrid effectiveness-implementation designs are underutilized in the brief alcohol intervention literature.
- Interventions to date have not included dynamic feedback linking personal trajectories of different behaviors.

#### **Weaknesses**

- None noted

### **4. Approach:**

#### **Strengths**

- Investigators present preliminary data indicating that (a) the PFI is efficacious in this population in the short-term, (b) students are interested in feedback that updates based on their behavior, (c) students will complete the daily assessments, and (d) students will look at the feedback weekly, sometimes without being prompted. The proposed cross-tailored dynamic feedback modification represents a “modest” refinement to the existing intervention that is expected to improve its applicability in a previously-tested population; thus, this trial is appropriate for the hybrid effectiveness-implementation design.
- Use of retrospective and prospective assessment will allow investigators to examine effects across multiple modes of assessment.
- Investigators include a number of theoretically-based and high-impact secondary outcomes that will allow them to examine the fit of their theory and the societal impact of their intervention.

#### **Weaknesses**

- Investigators do not present the number of first-year students at each site or the expected rate of recruitment. It is unclear if recruitment of 300 participants in 12 months is feasible.
- Investigators will be underpowered to detect differences between the PFI+CDF vs PFI+GHI groups and, since no studies have examined the efficacy of the CDF, they have no evidence to support their claim that they will be sufficiently powered to detect this effect.
- Minor: Exclusion criteria are neglected in the proposal. It is unclear if investigators will include students with significant co-occurring mental health disorders or those who meet criteria for severe substance use disorders.
- Minor: It is not clear that the technology platform has been developed. This is considered a minor weakness, as the PI has a history of successful research collaboration with the tech team.

### **5. Environment:**

#### **Strengths**

- The University of Kentucky and the University of North Texas have sufficient facilities and resources to undertake the proposed project.
- The Klein Buendel, Inc. provides unique resources in terms of intervention development.

#### **Weaknesses**

RAY, A

- It is unclear that institutions have sufficient participant flow to undertake the proposed RCT with a 13-month follow-up.

**Study Timeline:****Strengths**

- The timeline is generally organized and clear.

**Weaknesses**

- Participant flow is not described, so it is unclear if 12 months will be sufficient to recruit 300 heavy-drinking first-year students who are sexually active.
- There is a 6-month gap between the final Phase 2 follow-up assessment and the beginning of Phase 3 focus groups. The rationale for this is unclear.

**Protections for Human Subjects:**

## Acceptable Risks and/or Adequate Protections

- Risks are considered and addressed.

## Data and Safety Monitoring Plan (Applicable for Clinical Trials Only):

## Acceptable

- An external Data Safety Monitoring Board will be appointed.

**Inclusion Plans:**

- Sex/Gender: Distribution justified scientifically
- Race/Ethnicity: Distribution justified scientifically
- For NIH-Defined Phase III trials, Plans for valid design and analysis: Scientifically acceptable
- Inclusion/Exclusion Based on Age: Distribution justified scientifically
- Inclusion plans are described and justified.

**Vertebrate Animals:**

Not Applicable (No Vertebrate Animals)

**Biohazards:**

Not Applicable (No Biohazards)

**Resubmission:**

- Investigators were responsive to critiques.

**Resource Sharing Plans:**

Acceptable

**Budget and Period of Support:**

RAY, A

Recommend as Requested

- No overlap identified.

**THE FOLLOWING SECTIONS WERE PREPARED BY THE SCIENTIFIC REVIEW OFFICER TO SUMMARIZE THE OUTCOME OF DISCUSSIONS OF THE REVIEW COMMITTEE, OR REVIEWERS' WRITTEN CRITIQUES, ON THE FOLLOWING ISSUES:**

**PROTECTION OF HUMAN SUBJECTS: UNACCEPTABLE**

No procedures are in place to address Title IX mandated reporting or follow-up contact with the participants regarding victimization experiences.

**INCLUSION OF WOMEN PLAN: ACCEPTABLE**

**INCLUSION OF MINORITIES PLAN: ACCEPTABLE**

**INCLUSION ACROSS THE LIFESPAN: ACCEPTABLE**

**COMMITTEE BUDGET RECOMMENDATIONS: The budget was recommended as requested.**

---

Footnotes for 1 R01 AA028246-01A1; PI Name: Ray, Anne Elizabeth

NIH has modified its policy regarding the receipt of resubmissions (amended applications). See Guide Notice NOT-OD-18-197 at <https://grants.nih.gov/grants/guide/notice-files/NOT-OD-18-197.html>. The impact/priority score is calculated after discussion of an application by averaging the overall scores (1-9) given by all voting reviewers on the committee and multiplying by 10. The criterion scores are submitted prior to the meeting by the individual reviewers assigned to an application, and are not discussed specifically at the review meeting or calculated into the overall impact score. Some applications also receive a percentile ranking. For details on the review process, see [http://grants.nih.gov/grants/peer\\_review\\_process.htm#scoring](http://grants.nih.gov/grants/peer_review_process.htm#scoring).

## MEETING ROSTER

Interventions to Prevent and Treat Addictions Study Section  
Risk, Prevention and Health Behavior Integrated Review Group  
CENTER FOR SCIENTIFIC REVIEW  
IPTA

06/04/2020 - 06/05/2020

Notice of NIH Policy to All Applicants: Meeting rosters are provided for information purposes only. Applicant investigators and institutional officials must not communicate directly with study section members about an application before or after the review. Failure to observe this policy will create a serious breach of integrity in the peer review process, and may lead to actions outlined in NOT-OD-14-073 at <https://grants.nih.gov/grants/guide/notice-files/NOT-OD-14-073.html> and NOT-OD-15-106 at <https://grants.nih.gov/grants/guide/notice-files/NOT-OD-15-106.html>, including removal of the application from immediate review.

### CHAIRPERSON(S)

WALTON, MAUREEN A, PHD, MPH  
PROFESSOR  
DEPARTMENT OF PSYCHIATRY  
UNIVERSITY OF MICHIGAN  
ANN ARBOR, MI 48109

BUCKNER, JULIA D, PHD \*  
PROFESSOR AND DIRECTOR OF CLINICAL TRAINING  
DEPARTMENT OF PSYCHOLOGY  
LOUISIANA STATE UNIVERSITY  
BATON ROUGE, LA 70803

### MEMBERS

ALESSI, SHEILA MARIE, PHD \*  
ASSOCIATE PROFESSOR  
DEPARTMENT OF PSYCHIATRY  
CALHOUN CARDIOLOGY CENTER  
UNIVERSITY OF CONNECTICUT HEALTH CENTER  
FARMINGTON 06030

COLEMAN-COWGER, VICTORIA HOPE, PHD  
CLINICAL RESEARCH DIRECTOR  
THE EMMES CORPORATION  
ROCKVILLE, MD 20850

BERKEL, CADY, PHD \*  
ASSOCIATE RESEARCH PROFESSOR  
REACH INSTITUTE  
SOUTHWEST INTERDISCIPLINARY RESEARCH CENTER  
ARIZONA STATE UNIVERSITY  
TEMPE, AZ 85284

CROPSEY, KAREN L, PSYD  
PROFESSOR  
DEPARTMENT OF PSYCHIATRY AND BEHAVIORAL  
NEUROLOGY  
UNIVERSITY OF ALABAMA AT BIRMINGHAM  
BIRMINGHAM, AL 35294

BERMAN, MITCHELL E, PHD \*  
PROFESSOR AND DEPARTMENT HEAD  
DEPARTMENT OF PSYCHOLOGY  
MISSISSIPPI STATE UNIVERSITY  
MISSISSIPPI STATE, MS 39762

DUNN, KELLY E., PHD \*  
ASSOCIATE PROFESSOR  
DEPARTMENT OF PSYCHIATRY AND BEHAVIORAL  
SCIENCES  
SCHOOL OF MEDICINE  
JOHNS HOPKINS UNIVERSITY  
BALTIMORE, MD 21224-6823

BERNSTEIN, STEVEN L, MD  
PROFESSOR AND VICE CHAIR  
DEPARTMENT OF EMERGENCY MEDICINE  
YALE UNIVERSITY SCHOOL OF MEDICINE  
NEW HAVEN, CT 06519

FRIEDMANN, PETER D, MD, MPH  
PROFESSOR  
DEPARTMENT OF MEDICINE  
UNIVERSITY OF MASSACHUSETTS  
MEDICAL SCHOOL - BAYSTATE  
SPRINGFIELD, MA 01107

BRADIZZA, CLARA M, PHD  
PROFESSOR  
SCHOOL OF SOCIAL WORK  
UNIVERSITY AT BUFFALO  
STATE UNIVERSITY OF NEW YORK  
BUFFALO, NY 14203

GRANT, SEAN, PHD \*  
ASSISTANT PROFESSOR  
RICHARD M. FAIRBANKS SCHOOL OF PUBLIC HEALTH  
INDIANA UNIV-PURDUE UNIV AT INDIANAPOLIS  
INDIANAPOLIS, IN 46202

GRYCZYNSKI, JAN, PHD  
SENIOR RESEARCH SCIENTIST  
FRIENDS RESEARCH INSTITUTE  
BALTIMORE, MD 21201

HETTEMA, JENNIFER ELIN, PHD \*  
ASSOCIATE PROFESSOR  
DEPARTMENT OF FAMILY  
AND COMMUNITY MEDICINE  
UNIVERSITY OF NEW MEXICO SCHOOL OF MEDICINE  
ALBUQUERQUE 87131

HILL, KEVIN P., MD \*  
ASSOCIATE PROFESSOR OF PSYCHIATRY  
HARVARD MEDICAL SCHOOL  
BOSTON, MA 02215

HITSMAN, BRIAN L, PHD  
ASSOCIATE PROFESSOR  
DEPARTMENT OF PREVENTIVE MEDICINE  
FEINBERG SCHOOL OF MEDICINE  
NORTHWESTERN UNIVERSITY  
CHICAGO, IL 60611

INGERSOLL, KAREN S, PHD \*  
PROFESSOR  
DEPARTMENT OF PSYCHIATRY  
AND NEUROBEHAVIORAL SCIENCES  
UNIVERSITY OF VIRGINIA  
CHARLOTTESVILLE, VA 22911

KAHLER, CHRISTOPHER W., PHD \*  
PROFESSOR AND CHAIR  
DEPARTMENT OF BEHAVIORAL  
AND SOCIAL SCIENCES  
CENTER FOR ALCOHOL AND ADDICTION STUDIES  
BROWN UNIVERSITY SCHOOL OF PUBLIC HEALTH  
PROVIDENCE, RI 02912

KIM-MOZELESKI, JIN E., PHD \*  
ASSISTANT PROFESSOR  
DEPARTMENT OF POPULATION AND  
QUANTITATIVE HEALTH SCIENCES  
CASE WESTERN RESERVE UNIVERSITY  
CLEVELAND, OH 44106

LARSON, MARY JO, PHD  
SENIOR SCIENTIST  
INSTITUTE FOR BEHAVIORAL HEALTH  
HELLER SCHOOL FOR SOCIAL POLICY AND MANAGEMENT  
BRANDEIS UNIVERSITY  
WALTHAM, MA 02454

LITT, DANA M, PHD \*  
ASSOCIATE PROFESSOR  
DEPARTMENT OF HEALTH BEHAVIOR AND HEALTH  
SYSTEMS  
SCHOOL OF PUBLIC HEALTH SYSTEMS  
UNIVERSITY OF NORTH TEXAS  
FORT WORTH 76107

LOVEJOY, TRAVIS IAN, MPH, PHD \*  
ASSOCIATE PROFESSOR  
DEPARTMENT OF PSYCHIATRY  
SCHOOL OF MEDICINE  
OREGON HEALTH AND SCIENCE UNIVERSITY  
PORTLAND, OR 97239

MAHABEE-GITTENS, E. MELINDA, MD  
PROFESSOR  
DIVISION OF EMERGENCY MEDICINE  
CINCINNATI CHILDREN'S HOSPITAL MEDICAL CENTER  
CINCINNATI, OH 45229

MAISTO, STEPHEN A, PHD \*  
PROFESSOR  
DEPARTMENT OF PSYCHOLOGY  
SYRACUSE UNIVERSITY  
SYRACUSE, NY 13244

MCGOVERN, MARK P, PHD  
PROFESSOR  
DEPARTMENT OF PSYCHIATRY  
AND BEHAVIORAL SCIENCES  
STANFORD UNIVERSITY  
PALO ALTO, CA 93404

MENDELSON, TAMAR, PHD  
PROFESSOR  
DEPARTMENT OF MENTAL HEALTH  
JOHNS HOPKINS BLOOMBERG SCHOOL OF PUBLIC HEALTH  
BALTIMORE, MD 21205

MILLER, MARY ELIZABETH, PHD \*  
ASSISTANT PROFESSOR  
DEPARTMENT OF PSYCHIATRY  
UNIVERSITY OF MISSOURI  
COLUMBIA, MO 65211

MONTGOMERY, LATRICE, PHD \*  
ASSISTANT PROFESSOR  
ADDICTION SCIENCES DIVISION  
DEPARTMENT OF PSYCHIATRY  
AND BEHAVIORAL NEUROSCIENCE  
UNIVERSITY OF CINCINNATI COLLEGE OF MEDICINE  
CINCINNATI, OH 45229

NOONAN, DEVON, PHD \*  
ASSOCIATE PROFESSOR  
SCHOOL OF NURSING  
DUKE UNIVERSITY  
DURHAM, NC 27710

OLIVETO, ALISON, PHD  
PROFESSOR AND VICE CHAIR FOR RESEARCH  
DEPARTMENT OF PSYCHIATRY  
UNIVERSITY OF ARKANSAS FOR MEDICAL SCIENCES  
LITTLE ROCK, AR 72205

OSILLA, KAREN C, PHD  
SENIOR BEHAVIORAL SCIENTIST  
RAND CORPORATION  
SANTA MONICA, CA 90404

PARROTT, DOMINIC, PHD \*  
PROFESSOR  
DEPARTMENT OF PSYCHOLOGY  
GEORGIA STATE UNIVERSITY  
ATLANTA, GA 30302

PIPER, MEGAN E, PHD  
ASSOCIATE PROFESSOR  
DEPARTMENT OF MEDICINE  
UNIVERSITY OF WISCONSIN-MADISON  
MADISON, WI 53711

SCHEUERMANN, TANEISHA SHANI, PHD \*  
ASSISTANT PROFESSOR  
DEPARTMENT OF PREVENTIVE MEDICINE AND  
PUBLIC HEALTH  
UNIVERSITY OF KANSAS MEDICAL CENTER  
KANSAS CITY, KS 66160

STEIN, MICHAEL D, MD  
PROFESSOR AND CHAIR  
DEPARTMENT OF HEALTH LAW, POLICY AND MANAGEMENT  
BOSTON UNIVERSITY SCHOOL OF PUBLIC HEALTH  
BOSTON, MA 02118

STEINBERG, MARC L, PHD \*  
ASSOCIATE PROFESSOR  
DIVISION OF ADDICTION PSYCHIATRY  
ROBERT WOOD JOHNSON MEDICAL SCHOOL  
RUTGERS, THE STATE UNIVERSITY OF NEW JERSEY  
NEW BRUNSWICK, NJ 08901

TINDLE, HILARY A, MD, MPH  
ASSOCIATE PROFESSOR  
DIVISION OF INTERNAL MEDICINE AND PUBLIC HEALTH  
VANDERBILT UNIVERSITY MEDICAL CENTER  
NASHVILLE, TN 37203

TSOH, JANICE Y, PHD  
PROFESSOR  
DEPARTMENT OF PSYCHIATRY  
LANGLEY PORTER PSYCHIATRIC INSTITUTE  
UNIVERSITY OF CALIFORNIA SAN FRANCISCO  
SAN FRANCISCO, CA 94143

TSUI, JUDITH, MD, MPH \*  
ASSOCIATE PROFESSOR OF MEDICINE  
DIVISION OF GENERAL INTERNAL MEDICINE  
UNIVERSITY OF WASHINGTON SCHOOL OF MEDICINE  
HARBORVIEW MEDICAL CENTER  
SEATTLE, WA 98122

VELASQUEZ, MARY M, PHD  
CENTENNIAL PROFESSOR AND DIRECTOR  
HEALTH BEHAVIOR RESEARCH  
AND TRAINING INSTITUTE  
STEVE HICKS SCHOOL OF SOCIAL WORK  
UNIVERSITY OF TEXAS AT AUSTIN  
AUSTIN, TX 78712

VINCI, CHRISTINE, PHD \*  
ASSISTANT MEMBER  
DEPARTMENT OF HEALTH OUTCOMES AND BEHAVIOR  
MOFFITT CANCER CENTER  
TAMPA, FL 33612

WINSTANLEY, ERIN L, PHD \*  
ASSOCIATE PROFESSOR  
DEPARTMENT OF BEHAVIORAL MEDICINE AND PSYCHIATRY  
WEST VIRGINIA UNIVERSITY, SCHOOL OF MEDICINE  
MORGANTOWN, WV 26506

YI, RICHARD, PHD \*  
PROFESSOR  
DEPARTMENT OF PSYCHOLOGY  
COFRIN LOGAN CENTER FOR ADDICTION RESEARCH AND  
TREATMENT  
UNIVERSITY OF KANSAS  
LAWRENCE, KS 66045

#### SCIENTIFIC REVIEW OFFICER

MINTZER, MIRIAM, PHD  
SCIENTIFIC REVIEW OFFICER  
CENTER FOR SCIENTIFIC REVIEW  
NATIONAL INSTITUTES OF HEALTH  
BETHESDA, MD 20892

#### EXTRAMURAL SUPPORT ASSISTANT

FAYEMIWO, TOLU, MS  
EXTRAMURAL SUPPORT ASSISTANT  
CENTER FOR SCIENTIFIC REVIEW  
NATIONAL INSTITUTES OF HEALTH  
BETHESDA, MD 20892

\* Temporary Member. For grant applications, temporary members may participate in the entire meeting or may review only selected applications as needed.

Consultants are required to absent themselves from the room during the review of any application if their presence would constitute or appear to constitute a conflict of interest.
